# Supplementary material for: Development and Application of Computerized Risk Registry and Management Tool Based on FMEA and FRACAS for Total Testing Process
Source: MDPI journal article supplement (doi:10.3390/medicina57050477), 2021-05-11
Supplement: s1 [file s1]

**Table S1.** Example of risk management cases of the study.

| No. | Stage* | Failure mode                                                      | Effect                                                                                                                                         | Cause                                                                          | Plan                                                                                                                                                                                              | Action                                                                         | Result                          | Before action |   |   |    | Post action |   |   |    |
|-----|--------|-------------------------------------------------------------------|------------------------------------------------------------------------------------------------------------------------------------------------|--------------------------------------------------------------------------------|---------------------------------------------------------------------------------------------------------------------------------------------------------------------------------------------------|--------------------------------------------------------------------------------|---------------------------------|---------------|---|---|----|-------------|---|---|----|
|     |        |                                                                   |                                                                                                                                                |                                                                                |                                                                                                                                                                                                   |                                                                                |                                 | S             | F | D | R  | S           | F | D | R  |
| 1   | 2      | It is requested to test tests that cannot be done with BF samples | 1. Inaccurate results reported.<br>2. When inquiring cumulative results, BF results overlap with blood test results, causing confusion.        | 1. In CPOE, samples of any kind are allowed to be mapped to the any test item. | 1. Staff training in the reception unit (to check the sample type)<br>2. Staff training in testing unit (to check the sample type)<br>3. Modify CPOE to prescribe only specified samples by test. | 1. Done<br>2. Done<br>3. Can be implemented in CPOE replacement years from now | Risk management action is done. | 1             | 3 | 3 | 9  | 1           | 3 | 3 | 9  |
| 2   | 3      | Missing urine sample in creatine clearance test                   | 1. Delete reported serum result<br>2. Retest using resampled urine and serum sample<br>3. Unnecessary reagent consumption<br>4. Result delayed | Lack of concentration in nurses                                                | 1. Nurse training<br>2. Staff training in the reception unit (to check the sample pair)                                                                                                           | 1. Done<br>2. Done                                                             | Monitoring should be continued. | 3             | 4 | 5 | 60 | 3           | 4 | 3 | 36 |
| 3   | 3      | Collect random urine for 24-hour urine prescription               | 1. Invalid result reported<br>2. Resampling needed                                                                                             | Lack of concentration in nurses                                                | 1. Nurse training<br>2. Staff training in the reception unit (to check the sample type)                                                                                                           | 1. Done<br>2. Done                                                             | Monitoring should be continued. | 3             | 3 | 3 | 27 | 3           | 3 | 2 | 18 |
| 4   | 4      | Barcode reading error                                             | 1. Result delayed                                                                                                                              | Bad barcode print status                                                       | 1. Nurse training<br>2. Staff training in the reception unit (to check the sample quality)                                                                                                        | 1. Done<br>2. Done                                                             | Monitoring should be continued. | 1             | 5 | 3 | 15 | 1           | 5 | 3 | 15 |

|   |   |                                                                                                                 |                                                                                                                                       |                                                                                                                                               |                                                                                                                                                                                                                                       |                                                                     |                                 |   |   |   |    |   |   |   |    |
|---|---|-----------------------------------------------------------------------------------------------------------------|---------------------------------------------------------------------------------------------------------------------------------------|-----------------------------------------------------------------------------------------------------------------------------------------------|---------------------------------------------------------------------------------------------------------------------------------------------------------------------------------------------------------------------------------------|---------------------------------------------------------------------|---------------------------------|---|---|---|----|---|---|---|----|
| 5 | 4 | 1. Two different reagents interchanged and incorrectly installed<br>2. Did not prime after reagent installation | Calibration and QC passed because there was a reagent left in the line, and the patient results were incorrectly measured afterwards. | 1. Both reagent bins look the same<br>2. Not familiar with the instructions for reagent replacement                                           | 1. Attach the warning sign to the location of the reagent mounting.<br>2. Staff training to re-check the instructions<br>3. Provide a summary of the instruction around the work place<br>4. Requesting design change to manufacturer | 1. Done<br>2. Done<br>3. Done<br>4. Requested, but not yet modified | Monitoring should be continued. | 5 | 2 | 2 | 20 | 5 | 2 | 1 | 10 |
| 6 | 5 | Incorrect retesting results reported with existing sample during resampling                                     | 1. Incorrect retesting results reported<br>2. Incorrect treatment applied                                                             | 1. Request to resample without reporting results<br>2. The reception was canceled only by computer. Existing sample was not actually disposed | 1. All CVR results will be re-examined and the result will be entered.<br>2. Do not leave results blank for reasons of resampling<br>3. Take the sample in your hand, cancel the computer application, and discard it                 | 1. Training completed<br>2. Instruction is modified                 | Risk management action is done. | 3 | 3 | 3 | 27 | 3 | 3 | 1 | 9  |
| 7 | 5 | Instrument stopped during testing due to insufficient sample volume                                             | 1. Result delayed<br>2. Resampling needed                                                                                             | Insufficient sample volume                                                                                                                    | 1. Blood collector training<br>2. Staff training<br>3. Sample volume check during preanalytic phase                                                                                                                                   | 1. Done<br>2. Done<br>3. Done                                       | Monitoring should be continued. | 3 | 4 | 2 | 24 | 3 | 4 | 1 | 12 |
| 8 | 6 | Reported incorrect results without checking Flag sign                                                           | 1. Invalid result reported<br>2. Retesting needed                                                                                     | Lack of concentration in staff                                                                                                                | 1. Highlight the flag so that it can be seen clearly visible<br>2. Staff training to re-check the instructions<br>3. Provide a summary of the instruction                                                                             | 1. Done<br>2. Done<br>3. Done                                       | Risk management action is done. | 3 | 3 | 2 | 18 | 3 | 2 | 1 | 6  |

|    |   |                                                                                                                                |                                                   |                                                                                                                                                                                                       |                                                                                                                                                                                                                                                                                                                                                                                                                                                                                                      |                                                                                 |                                 |   |   |   |    |   |   |   |    |
|----|---|--------------------------------------------------------------------------------------------------------------------------------|---------------------------------------------------|-------------------------------------------------------------------------------------------------------------------------------------------------------------------------------------------------------|------------------------------------------------------------------------------------------------------------------------------------------------------------------------------------------------------------------------------------------------------------------------------------------------------------------------------------------------------------------------------------------------------------------------------------------------------------------------------------------------------|---------------------------------------------------------------------------------|---------------------------------|---|---|---|----|---|---|---|----|
| 9  | 6 | Result is reported without re-examination even though delta/panic verification has been detected and aspiration error occurred | 1. Invalid result reported<br>2. Retesting needed | 1. Foreign substances (fibrinogen, micro clots) are present in serum<br>2. Too many results that fail delta and panic verification.<br>3. Subjective judgment of workers whether to re-examine or not | around the work place<br>1. Staff training in sampling unit<br>- Mix samples six times after collecting blood<br>- Centrifugal separation after 10 to 15 minutes of blood collection<br>2. Staff training in testing unit<br>- Test after checking for foreign substances with eyes<br>3. The delta criteria for the interface and LIS must be the same<br>4. Modify delta criteria, which can reduce retesting rate<br>5. Automatic re-examination of all items in case of aspiration error occurs. | 1. Done<br>2. Done<br>3. Done<br>4. In the process of verifying data<br>5. Done | Monitoring should be continued. | 3 | 3 | 2 | 18 | 3 | 2 | 2 | 12 |
| 10 | 6 | Results reported as blank                                                                                                      | 1. Invalid result reported<br>2. Retesting needed | The result was not properly verified                                                                                                                                                                  | Check again before reporting results                                                                                                                                                                                                                                                                                                                                                                                                                                                                 | Done                                                                            | Monitoring should be continued. | 3 | 3 | 2 | 18 | 3 | 2 | 2 | 12 |
